# Supplementary material for: Genetically Engineered Frameshifted YopN-TyeA Chimeras Influence Type III Secretion System Function in Yersinia pseudotuberculosis
Source: PubMed Central journal article supplement (PMC3789692; doi:10.1371/journal.pone.0077767), 2013-10-03
Supplement: pone.0077767.s004.pdf [file pone.0077767.s004.pdf]

## Supplementary Table S1. Oligonucleotides used in this study

| Purpose/vector                                             | Oligonucleotide name and sequence                                                                                                                                                                                                                                              |
|------------------------------------------------------------|--------------------------------------------------------------------------------------------------------------------------------------------------------------------------------------------------------------------------------------------------------------------------------|
| Mutagenesis                                                |                                                                                                                                                                                                                                                                                |
| pAA256 ( <i>tyeA</i> <sub>Δ19-59</sub> )                   | ptyeAd20-59a, 5'-AAG GCT CGA GGG ATA TAG ACT CGG TGA-3' ( <i>XhoI</i> ) and ptyeAd20-59b, 5'-GCG CTT GTC AAC CAG TGC-3'<br>ptyeAd20-59c, 5'-GCA CTG GTT GAC AAG CGC TTT AGC GAT GAG GAG CAA C-3' and ptyeAd20-59d, 5'-AAG GTC TAG AGC GCT AAC CAC AAT GTC A-3' ( <i>XbaI</i> ) |
| pSF019 ( $\Delta yopN$ , <i>tyeA</i> )                     | pyopNa1, 5'-AAA GTC GAC ACC TAC AAT GCC ATG ACG-3' ( <i>Sall</i> ) and pyopNtyeAb, 5'-AGA TAG GTT ATG AAG CGT CG-3'<br>pyopNtyeAc, 5'-ACG CTT CAT AAC CTA TCT TTT AGC GAT GAG GAG CAA CGG-3' and ptyeAd, 5'-AAA TCT AGA GAA CGC GCT AAC CAC-3' ( <i>XbaI</i> )                 |
| pAA251 ( <i>yopN</i> <sub>Yps→Yen</sub> )                  | pyopNa2, 5'-AAA GTC GAC CTG CGG CTT GCG TGA TG-3' ( <i>Sall</i> ) and pyopN-23b, 5'-TAT ACC CTC TGA AAA AAA TTG CC-3'<br>pyopN-23c, 5'-TTT CAG AGG GTA TAA CTA ATG GCG T-3' and ptyeAd ( <i>XbaI</i> )                                                                         |
| pAA242 ( <i>yopN</i> <sub>278(F+1)</sub> <i>tyeA</i> )     | pyopNa2 ( <i>Sall</i> ) and pyopN278+1b, 5'-CCA AAT CCT TTA ACT TGG TCA-3'<br>pyopN278+1c, 5'-CCA AGT TAA AGG ATT TGG CAA TTT TTT TCA GA-3' and ptyeAd ( <i>XbaI</i> )                                                                                                         |
| pAA243 ( <i>yopN</i> <sub>278(F+1)</sub> , <i>SDtyeA</i> ) | pyopNa2 ( <i>Sall</i> ) and ptyeA-SDb, 5'-ACG TTG AAA AAA ATT GCC AAA TCC TTT AAC TTG GTC-3'<br>ptyeA-SDc, 5'-GGA TTT GGC AAT TTT TTT CAA CGT GTA AAA CTA ATG GCG T-3' and ptyeAd ( <i>XbaI</i> )                                                                              |
| pAA247 ( <i>yopN</i> <sub>287(F+1)</sub> <i>tyeA</i> )     | pyopNa2 ( <i>Sall</i> ) and pyopN287+1b, 5'-ACG CCA TAG TTT TAC CCT CTG-3'<br>pyopN287+1c, 5'-CAG AGG GTA AAA CTA TGG CGT ACG ACC TTT CTG-3' and ptyeAd ( <i>XbaI</i> )                                                                                                        |
| pAA248 ( <i>yopN</i> <sub>287(F+1)</sub> , <i>SDtyeA</i> ) | pyopNa2 ( <i>Sall</i> ) and ptyeA-SDb2, 5'-CCA TAG TTT TGC CTT CGG AAA AAA ATT GCC AAA ATC C-3'<br>ptyeA-SDc2, 5'-CCG AAG GCA AAA CTA TGG CGT ACG ACC TTT CTG-3' and ptyeAd ( <i>XbaI</i> )                                                                                    |
| pAA252 ( <i>yopN</i> <sub>F278F</sub> )                    | pyopNa2 ( <i>Sall</i> ) and pyopN-24b, 5'-GAA TCC TTT AAC TTG GTC AC-3'<br>pyopN-24c, 5'-ATT CTG GCA ATT TTT TTC AGA GG-3' and ptyeAd ( <i>XbaI</i> )                                                                                                                          |
| pAA253 ( <i>yopN</i> <sub>W279F</sub> )                    | pyopNa2 ( <i>Sall</i> ) and pyopN-26b, 5'-GAA AAA TCC TTT AAC TTG GTC-3'<br>pyopN-26c, 5'-GAT TTT TCC AAT TTT TTT CAG AGG-3' and ptyeAd ( <i>XbaI</i> )                                                                                                                        |
| pAA254 ( <i>yopN</i> <sub>Δ278F</sub> )                    | pyopNa2 ( <i>Sall</i> ) and pyopN-28b, 5'-TCC TTT AAC TTG GTC ACT C-3'<br>pyopN-28c, 5'-GTT AAA GGA TGG CAA TTT TTT TCA G-3' and ptyeAd ( <i>XbaI</i> )                                                                                                                        |

pAA255 (*yopN*<sub>Δ279W</sub>)

pyopNa2 (*Sall*) and pyopN-28b

pyopN-29c, 5'-AAG GAT TTC AAT TTT TTT CAG AGG-3' and ptyeAd (*XbaI*)

pUA066 (YPTB0523 polar mutation)

pFpNQ066, 5'-TAT CGA TAC CGT CGA CTA TTC ACC CTG GCC CTA ACG C-3' (*Sall*) and pRpNQ066, 5'-ATG CGG TAC CTC TAG AAG TGC ACC GCC CAC GAG CAG T-3' (*XbaI*)

#### Ectopic expression

pAA269 (pYopN<sup>+</sup>, TyeA<sup>+</sup>) and  
pAA271 (pYopN<sub>278(F+1),SD</sub>TyeA<sup>+</sup>)

pYopN-bla\_for, 5'-ACGTGGATCCTCTCAGGGAGTAGTTATGACG-3' (*BamHI*) and  
YopN-TyeA\_rev, 5'-ACGTGAAATTCAGATCCTGGCAGAAATGG-3' (*EcoRI*)

pAA304 (pYopN<sup>+</sup>, TyeA-Flag<sup>®</sup>),  
pAA305 (pYopN<sub>Yps→Yen</sub><sup>+</sup>, TyeA-  
Flag<sup>®</sup>), pAA306

(pYopN<sub>278(F+1)</sub>TyeA-Flag<sup>®</sup>),  
pAA307 (pYopN<sub>278(F+1),SD</sub>TyeA-  
Flag<sup>®</sup>), pAA308

(pYopN<sub>287(F+1)</sub>TyeA-Flag<sup>®</sup>),  
pAA309 (pYopN<sub>287(F+1),SD</sub>TyeA-  
Flag<sup>®</sup>)

pYopN-bla\_for (*BamHI*) and pYopN-TyeAflag\_rev, 5'-  
ACGTGAAATTCCTACTTGTCATCGTCGTCCTTGTAGTCATCCAACCTCAATTC  
TTCC-3' (*EcoRI*)

---
